1 Title: **Spatial variation in introgression along a toad hybrid zone in France**

2 Running title: **Gene flow variation along a toad hybrid zone**

3

4 Authors: I. van Riemsdijk<sup>1,2\*</sup>, J.W. Arntzen<sup>1</sup>, G. Bucciarelli<sup>3,4</sup>, E. McCartney-Melstad<sup>3,4</sup>, M.  
5 Rafajlović<sup>5</sup>, P.A. Scott<sup>3</sup>, E. Toffelmier<sup>3,4</sup>, H. B. Shaffer<sup>3,4</sup>, B. Wielstra<sup>1,2</sup>

6

7 Affiliations:

8 <sup>1</sup>Naturalis Biodiversity Centre, Leiden, the Netherlands

9 <sup>2</sup>Institute of Biology Leiden, Leiden University, Leiden, the Netherlands

10 <sup>3</sup>Department of Ecology and Evolutionary Biology, UCLA, Los Angeles, California

11 <sup>4</sup>La Kretz Center for California Conservation Science, Institute of the Environment and  
12 Sustainability, UCLA, Los Angeles, California

13 <sup>5</sup>Department of Marine Sciences, University of Gothenburg, Gothenburg, Sweden

14

15 \*Correspondence: Isolde van Riemsdijk, [isolde.vanriemsdijk@naturalis.nl](mailto:isolde.vanriemsdijk@naturalis.nl)

16

17

18 **Abstract**

19 The barrier effect is a restriction of gene flow between diverged populations by barrier genes.  
20 Restriction of gene flow and asymmetric introgression over multiple transects indicates  
21 species wide (genetic) adaptations, whereas transect-specific barrier loci may indicate local  
22 adaptation to gene flow. Asymmetric introgression can be caused by selection, hybrid zone  
23 movement, asymmetric reproductive isolation, or a combination of these. We study two  
24 widely separated transects (northwest and southeast France) for the 900 km long hybrid zone  
25 between *Bufo bufo* and *B. spinosus* toads, using ~1200 markers from restriction-site  
26 associated DNA (RAD) sequencing data. Genomic and geographic clines were used to  
27 identify outlier markers which show restricted or elevated introgression. Twenty-six barrier  
28 markers are shared between transects (the union of 56 and 123 barrier markers identified in  
29 each transect), which is more than would be expected by chance. However, the number of  
30 barrier markers is twice as high in the southeast transect. In the northwest transect a high  
31 amount of (asymmetric) introgression from *B. spinosus* into *B. bufo* is consistent with hybrid  
32 zone movement or asymmetric reproductive isolation. In the southeast transect, introgression  
33 is symmetric and consistent with a stable hybrid zone. Differences between transects may be  
34 related to genetic sub-structure within *B. bufo*. A longer period of secondary contact in  
35 southeast France appears to result in a relatively stronger barrier effect than in the northwest.  
36 The *Bufo* hybrid zone provides an excellent opportunity to separate a general barrier to gene  
37 flow from local reductions in gene flow.

38

39 **Keywords:** Asymmetric introgression; barrier genes; *Bufo bufo*; *Bufo spinosus*; replicate  
40 transects; cline coupling.

41

42 **Introduction**

43 Hybrid zones provide an opportunity to study both the processes involved in, and the  
44 outcomes of, speciation (Hewitt, 1988). Barrier genes, defined as genomic regions that  
45 restrict gene flow and introgression between hybridizing populations, play a key role in  
46 speciation (Ravinet et al., 2017). Barrier genes can comprise genes involved in divergent  
47 ecological selection, mate choice, and genetic incompatibilities (Ravinet et al., 2017). Barrier  
48 genes can create genomic heterogeneity, with relatively strong differentiation of these genes  
49 themselves as well as the genomic regions surrounding them, which may prohibit complete  
50 merging of the parental populations (Abbott et al., 2013; Barton, 2013; Ravinet et al., 2017).

51 The barrier effect is a reduction of effective migration rate of genetic material between  
52 populations, relative to the dispersal of the individuals carrying those genes (Ravinet et al.,  
53 2017). Barrier genes and their linked loci (together referred to as ‘barrier markers’ here) are  
54 expected to show relatively steep transitions at species boundaries (Gompert, Parchman, &  
55 Buerkle, 2012; Butlin & Smadja, 2018). This barrier effect is reinforced when the gene  
56 frequency clines of multiple barrier genes become geographically coincident in a hybrid  
57 zone, a phenomenon referred to as cline coupling (Butlin & Smadja, 2018). When the same  
58 markers show such steep and co-distributed transitions along multiple, geographically distant  
59 transects across a hybrid zone, it is most likely that the two hybridizing species evolved a  
60 barrier effect across their entire species’ range (Teeter et al., 2009; Larson, Andrés,  
61 Bogdanowicz, & Harrison, 2013; Harrison & Larson, 2014; Larson, White, Ross, & Harrison,  
62 2014).

63 Patterns of introgression can be indicative of different types of selection. Asymmetric  
64 introgression in hybrid zones, where gene flow is more pronounced in one direction than in  
65 the other, can be caused by hybrid zone movement, positive selection, asymmetric  
66 reproductive isolation, or a combination of these. Hybrid zone movement occurs when one  
67 species outcompetes or out-disperses the other, and can cause elevated introgression of many

68 neutral markers in the wake of the movement (Gay, Crochet, Bell, & Lenormand, 2008;  
69 Excoffier, Foll, & Petit, 2009; Wielstra, Burke, Butlin, & Arntzen, 2017; Wielstra, Burke,  
70 Butlin, Avci, et al., 2017; Wielstra, 2019). Asymmetric pre- or postzygotic isolation involves  
71 the successful reproduction of only certain combinations of individuals (e.g. hybrids can only  
72 backcross with one of the parental species), and most of the introgression takes place on the  
73 side of the hybrid zone where backcrossing is the most successful (Haldane, 1922; Hewitt,  
74 1975; Barton, 2001; Devitt, Baird, & Moritz, 2011). As hybrid populations receive more  
75 genes from the side of the hybrid zone where reproduction is most successful, asymmetric  
76 reproductive isolation can be a competitive advantage, and thus result in hybrid zone  
77 movement (Buggs, 2007). Adaptive introgression, on the other hand, would typically concern  
78 only one or a few markers (Barton & Hewitt, 1985; Barton, 2001).

79 The use of multiple transects across the same hybrid zone provides the ability to  
80 distinguish between general and local patterns of gene flow, and thus to identify pervading  
81 processes causal in reproductive isolation. We study two unique transects at opposite ends of  
82 a ca. 900 km long hybrid zone between the common toad, *Bufo bufo* (Linnaeus, 1758) and the  
83 spined toad, *B. spinosus* Daudin, 1803, which runs diagonally across France from the Atlantic  
84 coast in the north to the Mediterranean Sea in the south (Fig. 1; Arntzen et al., 2018). Given  
85 the low dispersal of both species, the *Bufo* hybrid zone provides an opportunity to test the  
86 consistency of patterns of restricted gene flow and elevated directional gene flow in  
87 independent transects. Previous studies on the individual transects suggested that weak  
88 asymmetric introgression may occur in both sections (Arntzen, de Vries, Canestrelli, &  
89 Martínez-Solano, 2017; van Riemsdijk, Butlin, Wielstra, & Arntzen, 2018). Expanding on  
90 this work, we use ~1200 nuclear markers, two to three orders of magnitude more than used in  
91 previous studies, to assess genome wide patterns on introgression in this hybrid zone.  
92 Assuming that reproductive isolation is consistent throughout the hybrid zone, we

93 hypothesise that the same barrier genes are consistently reducing gene flow between the two  
94 species in both transects.

95

## 96 **Material and Methods**

### 97 *3RAD sequencing*

98 DNA extracts of 387 individual toads were reused from previous research (Arntzen et al.,  
99 2016, 2017, 2018, in prep.). This included five reference sample sites each of presumably  
100 pure *B. bufo* and *B. spinosus*, 11 sample sites in transect one in northwest France, and 12  
101 sample sites in transect two in southwest France (Table S.1.; Fig. 1). For three presumably  
102 pure individuals of each species, libraries were prepared in triplicate (6 individuals x 3 = 18)  
103 to assess genotyping error rate after assembly (which was estimated to be 0.5%; Appendix 1).  
104 The 3RAD method (Graham et al., 2015; Glenn et al., 2016; Hoffberg et al., 2016; Bayona-  
105 Vázquez et al., 2019) was used to obtain reduced representation genomic libraries. Two  
106 restriction enzymes (*CLA-I* and *Sbf-I*) were used to cut 50 ng of genomic DNA from each  
107 sample, while a third enzyme (*MSP-I*) was added to cleave and eliminate phosphorylated  
108 adapter-adapter dimers. Internal barcodes were ligated to the resulting sticky ends and  
109 external Illumina iTru5 and iTru7 primers, differing by  $\geq 3$  bp, were added to the internal  
110 barcodes via an indexing PCR reaction (Glenn et al., 2016; Hoffberg et al., 2016; Bayona-  
111 Vázquez et al., 2019). For PCR details see supplementary data (High-Throughput 3RAD  
112 Protocol) in Bayona-Vázquez et al. (2019).

113 Upon individual library completion, DNA concentrations of seven libraries contained less  
114 than the required concentration for equimolar pooling, even after repeating the library  
115 preparation twice, thus the total volume of the library was included in the pool. All other  
116 libraries were combined to achieve equimolar concentrations in the final pool. The fragments  
117 in the pooled library were size selected for a range of 340-440 bp using a Pippin Prep (Sage

118 Science Inc. Beverly, MA), quantified using intercalating dye on a Victor multilabel plate  
119 reader, and were sequenced on two lanes of an Illumina HiSeq 4000 PE100 at the Vincent J.  
120 Coates Genomics Sequencing Laboratory in Berkeley, CA, USA.

121

### 122 *Data clean-up and assembly*

123 The average read count per sample was ~1.5 million paired-end reads (maximum 4.2 million  
124 reads, Table S.2). Twelve samples had low raw read quantities (near or below 0.5 million  
125 reads), including the seven samples with low DNA concentration, and were excluded.  
126 Cutadapt v.1.14 (Martin, 2011) was used in three steps to remove 5' and 3' primers for each  
127 internal barcode combination, remove the Illumina standard adapter, and carry out a read  
128 quality control. Subsequently, ipyrad v.0.7.3 (Eaton, 2014) was used to assemble the reads.  
129 Settings were: minimum read depth of six, maximum of eight heterozygous bases allowed per  
130 consensus sequence, and heterozygous sites allowed across a maximum of 50% of the  
131 samples (details in the supplements).

132

### 133 *Population structure*

134 Using a single randomly selected SNP per RAD fragment from the 50% dataset (which has  
135 47.5% missing data) and the 90% dataset (which has 2.3% missing data), we first ran a  
136 principal component analysis (PCA) to visualize genomic variation across both transects. We  
137 used the package 'adegenet' v.2.1.1 in R (Jombart, 2008; Jombart & Ahmed, 2011), and  
138 based the PCA on allele frequencies, replacing missing data with the mean of the total  
139 dataset.

140 We further quantified population structure with Structure v.2.3.4 (Pritchard, Stephens, &  
141 Donnelly, 2000) with the same datasets, for each transect separately. For both data sets, ten  
142 independent Structure runs for two to ten genetic clusters ( $K$ ) were completed with a burn in

143 of 10,000 MCMC steps followed by 25,000 MCMC steps under the admixture model using  
144 StrAuto (Chhatre & Emerson, 2017). Convergence of the results was checked by  
145 investigating log likelihood and admixture proportion stability (Benestan et al., 2016). The  
146 results were summarized with CLUMPAK (Kopelman, Mayzel, Jakobsson, Rosenberg, &  
147 Mayrose, 2015). The optimal value of  $K$  was determined with the Evanno method (Evanno,  
148 Regnaut, & Goudet, 2005). Structure results were visualised using the R package  
149 POPHELPER (Francis, 2017).

150

### 151 ***Diagnostic SNP selection***

152 Diagnostic SNPs were determined based on the genotypes of the 37 *B. bufo* and 20 *B.*  
153 *spinosus* individuals from the reference sample sites (Fig. 1; Table S.1, custom R script). In  
154 order to verify whether there was bias from taxon-specific patterns of missing data, missing  
155 data matrices were constructed with the 50% and 90% data sets, showing that data  
156 missingness is slightly biased towards *B. spinosus*, which is expected, as it is the more  
157 genetically diverse species of both (Fig. S.1) - so comparatively higher levels of allelic drop-  
158 out from mutated restriction sites would be expected in this species. To avoid these possible  
159 null-alleles, we removed all SNPs for which a locus was missing in all samples from the  
160 reference sample sites of a species from the dataset with a maximum of 50% missing SNPs  
161 per individual. We then selected all bi-allelic SNPs that were fixed for alternative  
162 homozygous variants in the set of reference samples of each species. Finally, we selected one  
163 random diagnostic SNP per fragment, resulting in 1,189 diagnostic SNPs. The percentage of  
164 missing data in the dataset after diagnostic SNP selection was 25.7%.

165

### 166 ***Hardy-Weinberg equilibrium***

167 We tested for signals of non-random mating success for each sample site in the dataset with  
168 diagnostic SNPs by calculating heterozygote excess and deficit from Hardy-Weinberg  
169 equilibrium with the R package ‘genepop’ based on the program GENEPOP v.1.0.5 (Rousset,  
170 2008). Instead of the conservative Bonferroni correction, which accounts for the number of  
171 tests performed in total, independence of tests was accounted for within markers ( $P_c$  for  
172  $N=1,189$ ; Rice 1989; Narum 2006). Many markers with a significance level uncorrected for  
173 repeated testing ( $P < 0.05$ ) in the hybrid zone populations for both heterozygote excess and  
174 deficit were present, but only 14 markers had a significant heterozygote deficit after  
175 correction (Table S.3). These markers were excluded in the HZAR geographic cline fitting  
176 analysis and admixture linkage disequilibrium calculations (see below).

177

### 178 ***Bayesian genomic cline outlier detection***

179 To study genome-wide variation of introgression among admixed individuals we used the  
180 Bayesian genomic cline model as implemented in the software BGC (Gompert & Buerkle,  
181 2011, 2012; Gompert et al., 2012). The Bayesian genomic cline model is based on the  
182 probability that an individual with a certain hybrid index (HI) inherited a gene variant at a  
183 given locus from one species ( $\phi$ ; in this case *B. bufo*) or the other ( $1 - \phi$ ; *B. spinosus*). The  
184 probability of *B. bufo* ancestry relative to expected (represented by the HI) is described by  
185 cline parameter  $\alpha$ . A positive  $\alpha$  indicates an increase in the *B. bufo* ancestry probability and a  
186 negative  $\alpha$  indicates a decrease. The cline parameter  $\beta$  measures the genomic cline rate based  
187 on ancestry for each locus. A positive  $\beta$  indicates an increased transition rate from a low to  
188 high probability of *B. bufo* ancestry as a function of the HI, which implies there are less  
189 heterozygotes for the marker than expected based on the HI, whereas a negative  $\beta$  indicates a  
190 decrease in the transition rate, which implies there are more heterozygotes than expected  
191 based on the HI (Gompert & Buerkle, 2011; Parchman et al., 2013). When more markers are



192 an outlier for  $\alpha$  in one direction than the other, this points to genome wide asymmetric  
193 introgression. When a marker is a negative outlier for cline parameter  $\beta$ , it is a candidate for a  
194 barrier marker, especially when the geographic cline is narrow and located in the centre of the  
195 hybrid zone.

196 The input files for parental genotypes included only individuals from the reference sample  
197 sites, and the input file for admixed genotypes included individuals with an average  
198 admixture proportion (Structure Q score) between 0.05 and 0.95, treated as a single  
199 population (Fig. S.2). A single MCMC chain was run for 75,000 steps and samples were  
200 taken from the posterior distribution every 5<sup>th</sup> step, following a burn-in of 25,000 steps.  
201 Convergence was assessed (Fig. S.3), and we tested for outlier loci using ‘estpost’ to  
202 summarise parameter posterior distributions (Gompert & Buerkle, 2011). Outlier loci were  
203 established based on 99.9% confidence intervals of parameters.

204

### 205 *Geographic cline analysis*

206 Classic geographic equilibrium cline models were fitted using the R package ‘HZAR’  
207 (Derryberry, Derryberry, Maley, & Brumfield, 2014) for all diagnostic SNPs. For transect  
208 one, sample sites 6 and 16, which are distant from the main axis of the transect, were  
209 removed from the dataset. To determine distance between the sample sites, a custom R script  
210 was used, and the directions of the transect axes were the same as in previous publications  
211 (Arntzen et al., 2016, 2017). Transect two is situated next to the Rhone river, which is  
212 considered a barrier to dispersal, and therefore the only logical direction of the transect is  
213 parallel to the river. The shapes and positions of many clines can be summarised in the  
214 expected cline, which can be represented by the HI (Polechová & Barton, 2011; Fitzpatrick,  
215 2012). We thus also fitted clines for the HI of all non-outlier markers as determined by BGC,  
216 as well as the HI of all heterozygote deficiency outliers ( $\beta > 0$ ), to be able to compare the

217 general shape and positions of these marker categories in a geographical setting. For  
218 example, the heterozygote deficiency outliers are expected to be geographically steep clines.

219 Thirty maximum likelihood estimation searches were performed with random starting  
220 parameters, followed by a trace analysis of 60,000 generations on all models with a delta  
221 Akaike information criterion corrected for small-sample-size ( $dAICc$ )  $< 10$ . Fifteen model  
222 variants were based on all possible combinations of trait intervals (allele frequency at the  
223 ends of the transects; three types) and tail shape (five types). Even though markers were  
224 restricted to be diagnostic, cline shapes sometimes were better described by clines with allele  
225 frequencies at the end of the cline different from zero or one. Convergence was visually  
226 assessed in trace plots (see supplemental material). To provide a measure of cline symmetry,  
227 we used a custom R script to estimate the area underneath the cline tail towards the left ( $Q_{left}$ )  
228 and the right ( $Q_{right}$ ) of the hybrid zone centre, up to the point where the HI reached a value of  
229 0.05 or 0.95 (Fig. S.4, supplements).

230

### 231 *Admixture linkage disequilibrium and effective selection*

232 To assess the most recent inflow of parental genotypes, linkage disequilibrium can be used.  
233 The first generation offspring of two diverged species will be heterozygous for all fixed  
234 differences, resulting in complete admixture linkage disequilibrium ( $D'$ ), rather than the usual  
235 linkage disequilibrium resulting from selection, assortment, mutation, or drift (Barton &  
236 Gale, 1993; Baird, 2015). Recombination during reproduction breaks down  $D'$ , whereas  
237 migration of parental (pure) individuals increases  $D'$  (Barton & Gale, 1993). When gene flow  
238 into the hybrid zone is symmetric, the peak of  $D'$  in the hybrid zone centre follows a  
239 Gaussian curve (Gay et al., 2008). Under hybrid zone movement, the peak is predicted to  
240 shift ahead of the movement to the side of the hybrid zone, opposite to the tail of neutral  
241 introgression where recombination has broken down the peak already (Gay et al., 2008;

242 Wang et al., 2011). The peak is expected to be more coincident with the tail of introgression  
243 in a case of asymmetric reproductive isolation (Devitt et al., 2011). The position of the peak  
244 of  $D'$  thus may be used to support the underlying process of asymmetric introgression.

245 Average effective selection on a locus ( $s^*$ ) is the selection pressure on a locus at the zone  
246 centre due to direct selection and association with other loci. Admixture linkage  
247 disequilibrium ( $D'$ ) based on the variance in hybrid index, which in turn allows the  
248 calculation of lifetime dispersal distance weighted for pre- and post- metamorphosis ( $\sigma$ ), and  
249  $s^*$  following Barton & Gale (1993), were calculated using scripts from van Riemsdijk et al.  
250 (2019). The data contained only markers in Hardy-Weinberg equilibrium and markers not  
251 indicated as outliers in BGC (832 and 652 loci) for each transect, because these markers  
252 represent the presumably neutral portion of the genome (Table 1). We repeated the analysis  
253 using only the markers that were heterozygote deficiency outliers ( $\beta > 0$ ; 56 and 121 loci) to  
254 represent the portion of the genome that experiences the highest barrier effect. Fixed  
255 parameters were: a recombination rate of 0.4997, calculated following formula (6) from  
256 Macholán et al. (2007), using the number of chiasmata per bivalent for *B. bufo* (1.95;  
257 Wickbom, 1945) and the number of chromosomes for *B. bufo* ( $N = 22$ ), a generation time  
258 (sexual maturity) of 2.5 years for *Bufo* at the latitude of the hybrid zone (mean of 3 years in  
259 females and 2 years in males; Hemelaar, 1988) and initial secondary contact 8,000 years ago  
260 following Arntzen et al. (2016). The width of the hybrid zone was derived from a general  
261 sigmoid cline model following HZAR (Derryberry et al., 2014), fitted to the HI, as tail shape  
262 is not taken into consideration in these calculations (Barton & Gale 1993). Mean and 95%  
263 confidence interval (CI) were based on 1,000 bootstrap replicates of the original genotype  
264 dataset (with replacement, maintaining original sample size within sites). Following Gay et  
265 al. (2008), we fitted a Gaussian curve through the estimates of  $D'$  and 95% confidence  
266 intervals (CI) for the calculated parameters were derived from the bootstrap data.

267

## 268 **Results**

### 269 *Data clean-up and assembly*

270 We assembled two data sets in which the minimum number of individuals that must have  
271 data for each locus to be retained was 194 (50% of the samples), and 349 (90%) of the 387  
272 total samples to generate matrixes with different levels of missing data for downstream  
273 analyses. These two datasets eventually contained 4,869 loci (39,750 SNPs), and 986 loci  
274 (10,535 SNPs), respectively. The PCA plots for the 50% and 90% datasets are highly similar  
275 (Fig. S.5). The structure results for both datasets showed that using a dataset with loci for  
276 which at least 90% of individuals have data, returned qualitatively similar results as using the  
277 dataset with more missingness, but more data (mean delta Structure Q score  
278 difference/individual = 0.014; standard deviation = 0.016).

279 Samples that had libraries prepared and sequenced in triplicate were initially analysed as  
280 part of the 50% missingness dataset. This showed that on average, pairwise *de novo*  
281 assemblies for each individual contained 79.8 % of the same RAD-loci, and for overlapping  
282 loci, differed at only 0.5% of the dataset-wide SNP calls. When manually inspected, the  
283 differences of SNP calls were often missed heterozygous calls (e.g. A vs R). Overall, this  
284 gives us confidence that our *de novo* assembly parameters strike a balance between read  
285 depth and missingness. For example, one would expect, setting higher read depth thresholds  
286 would result in fewer missed or erroneous SNP calls, but could also result in higher stochastic  
287 missingness of RAD-loci for a given sequencing effort.

288

### 289 *Population structure*

290 The first axis (PC1, 26.8%) of the PCA appears to reflect the genetic difference between pure  
291 *B. bufo* in the north (right) and pure *B. spinosus* in the south (left), with hybrids in the middle

292 (Fig. S.5). The second axis (PC2, 2.8%) separates the two transects. In Structure, the  
293 preferred number of genetic clusters for transect one was  $K=3$ , and for transect two  $K=2$  (Fig.  
294 S.2). In both transects, the plot for two genetic clusters reflects differentiation between the  
295 two species, with hybrids smoothly transitioning between the two, while the three-cluster  
296 model in transect one places hybrids in a group of their own. At both  $K=2$  and  $K=3$ , both  
297 transects have superficially similar structure, and hybrid individuals never approach being  
298 “pure” hybrid at  $K=3$ . In other words, hybrids are always shown to have ancestry that is  
299 admixed between a ‘hybrid’ population and both parental species.

300

### 301 ***Bayesian genomic cline outlier detection***

302 The dataset in the BGC analysis shows little bias in the proportion of observed hybrid indices  
303 (HI; Fig. S.6). Transect one has significantly more markers with a reduced probability of *B.*  
304 *bufo* ancestry ( $\alpha < 0$ ,  $n = 151$ ) than markers with an increased probability ( $\alpha > 0$ ,  $n = 110$ ,  $\chi^2$   
305 test  $P = 0.0112$ ; Table 1), relative to the hybrid index. Transect two has a nearly equal  
306 number of markers with an increased or decreased probability of *B. bufo* ancestry ( $\alpha > 0$ ,  $n =$   
307  $174$ ;  $\alpha < 0$ ,  $n = 185$ ,  $\chi^2$  test  $P = 0.5615$ ). The number of markers with an outlier  $\beta$  in transect  
308 one (heterozygote deficiency  $\beta > 0$ ,  $n = 56$  and heterozygote excess  $\beta < 0$ ,  $n = 42$ ) is about  
309 half the number detected in transect two ( $\beta > 0$ ,  $n = 123$ , and  $\beta < 0$ ,  $n = 105$ ). Of the RAD  
310 markers which are positive or negative outliers for  $\alpha$  or  $\beta$ , 22-61% are also outliers in transect  
311 two (last column Table 1). Such overlap is unlikely if the two transects were completely  
312 evolutionarily independent (Table 1). For example, the chance of the same 26 markers to act  
313 as barrier markers in both transects by chance is close to zero (last row Table 1).

314

### 315 ***Geographic cline analysis***

316 We verified that outlier markers for  $\alpha$  or  $\beta$  in the BGC analysis are correlated to outlier  
317 behaviour in the shape and position of their geographic cline, by plotting significant outliers  
318 for the parameters  $\alpha$  and  $\beta$  from BGC to the geographic cline parameters centre and width  
319 determined with HZAR (Fig S.6). When a marker is an outlier for  $\alpha$ , it would be expected  
320 that the cline is shifted (centre) or has a different shape (e.g. width), or both, compared to the  
321 genomic average (e.g. represented by the HI cline). When a marker is an outlier for  
322 heterozygote deficiency ( $\beta > 0$ ) it should also show a steep geographic cline, coincident with  
323 the HI cline (green clines, Fig. 2, Fig. S.7). We refer to such heterozygote deficiency ( $\beta > 0$ )  
324 markers as ‘barrier markers’. Markers that are not genomic outliers (not an outlier for  $\alpha$  nor  
325 for  $\beta$ ) are referred to as ‘neutral markers’.

326 The HI cline based on neutral markers in transect one (northwest France) shows a high  
327 level of asymmetric introgression from *B. spinosus* into *B. bufo* by a fitted cline shape with a  
328 tail ( $Q_{\text{left}} = 15.0$ ,  $Q_{\text{right}} = 8.8$ ), whereas transect two (southeast France) shows a pattern of  
329 symmetric introgression by a cline shape without tails ( $Q_{\text{left}} = 11.0$ ,  $Q_{\text{right}} = 11.0$ ; Fig. 2, Table  
330 S.4, Fig. S.8, Fig. S.9). The cline widths for neutral markers in both transects are similar (47  
331 km and 49 km), and the cline shape in the centre is generally steep (Fig. 3). The HI clines for  
332 barrier markers are symmetrical in both transects (Table S.4).

333

### 334 ***Admixture linkage disequilibrium***

335 The admixture linkage disequilibrium ( $D'$ ) for neutral markers shows a peak in the centre of  
336 the hybrid zone in both transects, although the amplitude of the peak in transect one is one  
337 fifth of the peak in transect two (Fig. 2). As barrier markers are less likely to flow away from  
338 the hybrid zone centre, the peak of  $D'$  for barrier markers may be more sensitive to shifts of  
339 the hybrid zone centre. In transect one, barrier markers showed a peak with higher  $D'$  on the  
340 *B. bufo* side of the hybrid zone, but displacement of the Gaussian curve was not significant;

341 as the AIC was nearly equal when constraining the peak of D' to the cline centre (435 km) as  
342 when the peak was fitted unconstrained (resulting in a peak at 423 km). In transect two,  
343 barrier markers showed a peak of D' in the centre of the hybrid zone.

344 The lower peak of D' in transect one corresponds to a lower number of steep clines  
345 observed and underlies the lower estimates of effective selection against hybrids ( $s^*$ ) and  
346 lifetime dispersal compared to transect two, and not to a difference in cline width as these are  
347 comparable (see results section “geographic cline analysis” above). For transect one  $s^*$  is  
348 0.0022 (95% CI 0.0012-0.0034) whereas it is about an order of magnitude greater for transect  
349 two, where  $s^*$  is 0.0195 (95% CI 0.0143-0.0252; Table S.5). The  $s^*$  based on barrier markers  
350 for transect one is 0.0101 (95% CI 0.0054-0.0152) and for transect two 0.0344 (95% CI  
351 0.0220-0.0470). Notably, the confidence intervals for both estimates of  $s^*$  in each hybrid  
352 zone do not overlap. We estimated the lifetime dispersal distance based on neutral markers  
353 for transect one and two at 1.8 (95% CI 1.3-2.2) and 4.0 (95% CI 3.4-4.5) km per generation,  
354 respectively.

355

## 356 **Discussion**

357

### 358 *Asymmetry of introgression in northwest France*

359 In northwest France (transect one), Bayesian genomic cline analysis indicates a significant  
360 asymmetry in gene flow, with more alleles from *B. bufo* flowing into *B. spinosus*, than the  
361 other way around (Table 1). On the other hand, a shift in the HI geographic cline based on  
362 neutral markers, which is the baseline to determine outliers in the Bayesian genomic clines  
363 analysis, shows asymmetric neutral introgression from *B. spinosus* into *B. bufo* (Fig. 2). The  
364 combination of a high amount of possibly selective gene flow from *B. bufo* into *B. spinosus*,  
365 and a tail of neutral introgression towards the north (from *B. spinosus* into *B. bufo*) could be

366 pointing to southward hybrid zone movement due to an advantage of *B. bufo* over *B.*  
367 *spinosus*. A neutral tail of introgression towards the north was previously interpreted as a tail  
368 of introgression in the wake of (past) hybrid zone movement, and the hybrid zone was  
369 thought to have stabilised at a gradient of elevation (Arntzen et al., 2016). The pattern of  
370 introgression currently observed, a tail towards the north with a coincident peak of admixture  
371 linkage disequilibrium ( $D'$ ) is highly similar to the pattern observed in van Riemsdijk et al.  
372 (2019). Alternative explanations for such asymmetric introgression could be asymmetric  
373 reproductive isolation due to mating preferences or mitonuclear incompatibilities.

374 When studying single transects, often more than one potential explanation for asymmetric  
375 introgression across a hybrid zone are reported. Providing solid proof of hybrid zone  
376 movement or asymmetric reproductive isolation proves to be difficult (Buggs, 2007; Toews  
377 & Brelsford, 2012; Brandvain, Pauly, May, & Turelli, 2014; Wielstra, 2019). Yet some  
378 studies provide convincing support for one explanation over the other by combining multiple  
379 lines of evidence. For example, in a group of Neotropical jacanas (*Jacana*), females of the  
380 larger and more aggressive species more often mother hybrid offspring in sympatric regions,  
381 which resulted in a shift of female body mass relative to the genetic cline centre (Lipshutz et  
382 al., 2019). In crested newts (*Triturus*), the position of enclaves (distribution relicts),  
383 predictions of distribution models, and genome-wide asymmetric introgression support  
384 hybrid zone movement as a cause of asymmetric introgression (Wielstra & Arntzen, 2012;  
385 Wielstra, Burke, Butlin, & Arntzen, 2017). For the *Bufo* hybrid zone, additional evidence in  
386 the form of behavioural, breeding, distribution modelling or simulation studies may thus  
387 provide stronger support for the cause of the asymmetric introgression observed in northwest  
388 France.

389

390 *Symmetry of introgression in southeast France*



391 In southeast France (transect two), both genetic and genomic cline analyses reveal equal  
392 amounts of introgression on both sides of the hybrid zone. Therefore, the zone appears to be  
393 stable. Whilst the geography of the northwest transect is relatively homogeneous (e.g.  
394 altitude, Fig. 1), the hybrid zone in southeast France locally runs in parallel to landscape  
395 features (rivers and mountains) that are associated with the species range border (Arntzen et  
396 al., 2018). Barrier genes may be coupled to a steep gradient of local adaptive genes between  
397 two populations and stabilise a hybrid zone at an ecotone (Bierne, Welch, Loire, Bonhomme,  
398 & David, 2011). In such a situation, the local steep environmental gradient may be repeated  
399 in the vicinity of the hybrid zone centre (e.g. the presence of multiple hills in a row), but the  
400 barrier effect may keep the locally adaptive genes locked in the hybrid zone (e.g. on one  
401 hillside, Bierne et al., 2011). The hybrid zone in southeast France may be trapped at such a  
402 steep gradient of locally adaptive markers.

403

#### 404 *A barrier to gene flow in Bufo transects*

405 The number of barrier markers (as identified in the genomic cline analysis) in transect one  
406 (northwest France; n=56) is approximately half that of transect two (southeast France;  
407 n=123), and the estimated selection against hybrids in the neutral markers in the dataset is  
408 significantly lower in transect one ( $s^*$  is 0.0022) than in transect two ( $s^*$  is 0.0195, Table 1,  
409 Table S.5). As expected, the majority of the barrier markers as identified by the genomic  
410 cline analysis also show a narrow geographical cline with a transition confined to the centre  
411 of the hybrid zone. Our results thus support the idea that the higher the number of barrier  
412 genes restricting gene flow is, the higher the overall effective selection against hybrids will  
413 be (Barton, 1983; Barton & Gale, 1993; Bierne et al., 2011; Vines et al., 2016). It thus  
414 appears that the barrier effect is less prominent in transect one than in transect two.

415 A difference in negative selection in different parts of the hybrid zones can be caused by  
416 several biological processes, including differences in the length of secondary contact, a  
417 difference in linkage of barrier genes and involvement of different genetic groups, as we  
418 further discuss below. The barrier markers, with relatively steep clines, for which the  
419 geographical cline centre is not fixed to the hybrid zone are mostly “shifted” towards the  
420 south, from *B. bufo* into *B. spinosus* (Fig. 3). The transition of these few shifted barrier  
421 markers is somewhere between the last sample location of the transect and the reference  
422 populations, and more samples towards the south would be needed to determine their shape  
423 and centre more precisely.

424 During postglacial expansion, secondary contact between *B. bufo* and *B. spinosus* is  
425 suggested to first have established in the southeast of France and at a later point in the  
426 northwest (Arntzen et al., 2017), closing the gap between the two species in a zipper-like  
427 manner. As a consequence, cline coupling may have progressed further towards reproductive  
428 isolation after secondary contact, and is still ongoing throughout the hybrid zone (Harrison &  
429 Larson, 2016; Butlin & Smadja, 2018; Dagilis, Kirkpatrick, & Bolnick, 2019). Species  
430 divergence with gene flow is predicted to result in more clustering of neutral and barrier loci  
431 in certain genomic regions, than species divergence without gene flow, and in this way may  
432 provide a stronger barrier against gene flow (Noor, Grams, Bertucci, & Reiland, 2001;  
433 Rieseberg, 2001; Emelianov, Marec, & Mallet, 2004; Nosil, Funk, & Ortiz-Barrientos, 2009;  
434 Yeaman & Whitlock, 2011; Harrison & Larson, 2016; Rafajlović, Emanuelsson,  
435 Johannesson, Butlin, & Mehlig, 2016; Schumer et al., 2018). The barrier markers shared  
436 across both transects may therefore be clustered in a few low-recombination regions, or  
437 linked to the causal variant and maintained through linkage to loci under strong selection.  
438 Whether the higher number of barrier markers observed in the southeast of France is due to  
439 the age of the hybrid zone, and more specifically, due to the presence of a higher number of

440 barrier genes, or lower recombination rate surrounding barrier genes is not possible to  
441 determine with the current dataset, without the aid of a linkage map or sequenced genome.

442 The two transects share 26 barrier markers (the union of 56 and 123 barrier markers  
443 identified in each transect), which is unlikely to be the result of chance (see statistic test in  
444 Materials & Methods, and details in Table 1). Overlap of markers involved in the restriction  
445 of gene flow in multiple transects pointed to intrinsic similarities of a barrier effect in the  
446 sunflower (*Helianthus*) hybrid zone, one of the first hybrid zones studied with multiple  
447 transects, with gene flow restricted by genomic regions linked to pollen sterility and  
448 chromosomal rearrangements (Rieseberg, Whitton, & Gardner, 1999; Buerkle & Rieseberg,  
449 2001). Under laboratory conditions the barrier genes were also found to restrict gene flow,  
450 which excluded the possibility of the involvement of external factors (Buerkle & Rieseberg,  
451 2001). In field crickets (*Gryllus*) the same barrier genes restricted gene flow in two sections  
452 of the hybrid zone and barrier genes were linked to intrinsic factors of prezygotic isolation  
453 (Larson, Andrés, et al., 2013; Larson, Guilherme Becker, Bondra, & Harrison, 2013; Larson  
454 et al., 2014). In both these examples, the overlap of barrier genes could be linked to processes  
455 important for reproduction, which appear to have played a role in the initial isolation of two  
456 species.

457 However, more often than not, the markers restricting introgression differ between  
458 transects in the same hybrid zone (see for an overview Harrison & Larson, 2016). In the well-  
459 studied house mouse hybrid zone (*Mus*), patterns of restricted gene flow differ among  
460 transects, suggesting also different genetic architectures of isolation between the two species  
461 (Teeter et al., 2009). However, just as for *Bufo*, there were markers which show restricted  
462 introgression in both transects in *Mus*, which were linked to hybrid sterility in laboratory  
463 settings (Janoušek et al., 2012). A similar situation is observed in the *Bufo* hybrid zone.

464 Experimental studies are required to explore the functional roles of the barrier markers in the  
465 *Bufo* hybrid zone.

466

#### 467 ***Intraspecific divergence within B. bufo***

468 The *B. bufo* toads in northwest France possess an mtDNA clade that resided in a refugium in  
469 the northern Balkans during the last glacial maximum (22,000 BP), whilst *B. bufo* in  
470 southeast France carry mtDNA variants that survived in Italy, and in the northern and western  
471 Balkans (Garcia-Porta et al., 2012; Recuero et al., 2012; Arntzen et al., 2017). Meanwhile, *B.*  
472 *spinosus* individuals from France belong to a lineage derived from a single Iberian refugium  
473 (Garcia-Porta et al., 2012; Recuero et al., 2012; Arntzen et al., 2017). The difference in  
474 distance from these refugia to the current position of the hybrid zone may also have resulted  
475 in a later point of contact in northwest France, compared to southeast France and, perhaps,  
476 reduced opportunity for secondary contact in the northwest during previous interglacials.  
477 Additionally, *B. bufo* shows structural differences in chromosome morphology across its  
478 range, with all homogametic chromosomes observed in *B. bufo* in Russia (which presumably  
479 belong to the same mitochondrial clade occurring in northwest France), and a heterogametic  
480 pair of chromosomes in female *B. bufo* in Italy, whereas chromosome morphology within *B.*  
481 *spinosus* appears to be uniform (Morescalchi, 1964; Birstein & Mazin, 1982; Pisanets et al.,  
482 2009; Skorinov et al., 2018). Intraspecific mitochondrial and chromosome divergence in *B.*  
483 *bufo* may thus be reflected by (other) nuclear genetic substructure. Yet, the Structure and  
484 PCA results based on the total dataset, despite the inclusion of all 4,863 RAD markers, did  
485 not indicate the presence of multiple genetic groups in our *B. bufo* samples. But, given our  
486 sampling scheme (Fig. 1), this could be due to the lack of (pure) parental populations  
487 belonging to such potential genetic groups (Rogers & Bohlender, 2015). A range-wide

488 phylogeographic study based on nuclear DNA is required to assess whether diverged  
489 (nuclear) *B. bufo* groups are involved in the hybrid zone.

490

#### 491 ***Evolution of hybrid zones***

492 Long hybrid zones, such as the common toad and house mouse hybrid zones, appear to have  
493 two evolutionary trends in common; 1) barrier markers shared between transects, reflecting  
494 an overall barrier to gene flow along the entire hybrid zone, and 2) barrier markers specific to  
495 individual transects. Hence, long hybrid zones can provide unique insights in the different  
496 ways two lineages move towards speciation, or in the opposite direction, towards complete  
497 merging (Teeter et al., 2009; Larson, Andrés, et al., 2013; Harrison & Larson, 2014; Larson  
498 et al., 2014). The current study shows that the process of cline coupling, where additional  
499 barrier genes are recruited and converge geographically towards the hybrid zone (Butlin &  
500 Smadja 2018), may result in spatial variation in the set of barrier markers employed along the  
501 length of the hybrid zone.

502

#### 503 **Conclusion**

504 We find an overlap of barrier markers between two widely separated transects in the *Bufo*  
505 hybrid zone, which indicates that a range wide barrier effect has evolved. The barrier effect is  
506 strong enough to have prevented the two *Bufo* species from merging despite secondary  
507 contact having been established about 8000 years ago (Arntzen et al., 2016; Arntzen, 2019).  
508 However, we propose that potential genetic substructure within *B. bufo* complicates the  
509 interpretation of overlap and differences between transects within this hybrid zone, and we  
510 recommend that future research explores the presence of subgroups based on genome-wide  
511 nuclear DNA data for a wider geographic range. The generation of a high-density linkage  
512 map or reference genome will be helpful to infer patterns of linkage and barrier loci in more

513 detail. Laboratory crosses of individuals from the resulting intraspecific *B. bufo* groups and *B.*  
514 *spinosus* could verify potential modes of (asymmetric) reproductive isolation (e.g. Malone &  
515 Fontenot, 2008; Stöck et al., 2013; Brandvain et al., 2014). The *Bufo* hybrid zone provides an  
516 excellent opportunity to separate a general barrier to gene flow from local reduction in gene  
517 flow specific to individual transects.

518

### 519 **Acknowledgements**

520 We thank Frido Welker, Tara Luckau, Roger K. Butlin, the members of the Butlin laboratory  
521 at the University of Sheffield, and the Allentoft laboratory at the Natural History Museum in  
522 Copenhagen for support and discussion. The PhD position of IvR is supported by the  
523 ‘Nederlandse Organisatie voor Wetenschappelijk Onderzoek’ (NWO Open Programme  
524 824.14.014). This project has received funding from the European Union’s Horizon 2020  
525 research and innovation programme under the Marie Skłodowska-Curie grant agreement No.  
526 655487. Part of this project was carried out by IR at the Shaffer laboratory in Los Angeles, at  
527 the University of California. This study trip has been sponsored by the Leiden University  
528 Fund / Swaantje Mondt Fonds (D7102). MR was funded by the Hasselblad Foundation Grant  
529 to Female Scientists, a grant from the Swedish Research Council Formas, and by additional  
530 grants from Swedish Research Councils (Formas and VR) to the Centre for Marine  
531 Evolutionary Biology at the University of Gothenburg ([www.cemeb.science.gu.se](http://www.cemeb.science.gu.se))

532

### 533 **References**

- 534 Abbott, R., Albach, D., Ansell, S., Arntzen, J. W., Baird, S. J. E., Bierne, N., ... Zinner, D. (2013).  
535 Hybridization and speciation. *Journal of Evolutionary Biology*, 26, 229–246.  
536 <https://doi.org/10.1111/j.1420-9101.2012.02599.x>  
537 Arntzen, J. W. (2019). An amphibian species pushed out of Britain by a moving hybrid zone.  
538 *Molecular Ecology*, 1–4.  
539 Arntzen, J. W., de Vries, W., Canestrelli, D., & Martínez-Solano, I. (2017). Hybrid zone formation  
540 and contrasting outcomes of secondary contact over transects in common toads. *Molecular*  
541 *Ecology*, 26, 5663–5675. <https://doi.org/10.1111/mec.14273>  
542 Arntzen, J. W., McAtear, J., Butôt, R., & Martínez-Solano, I. (2018). A common toad hybrid zone

- 543 that runs from the Atlantic to the Mediterranean. *Amphibia-Reptilia*, 39, 41–50.  
544 <https://doi.org/10.1163/15685381-00003145>
- 545 Arntzen, J. W., Trujillo, T., Butot, R., Vrieling, K., Schaap, O. D., Gutiérrez-Rodriguez, J., &  
546 Martínez-Solano, I. (2016). Concordant morphological and molecular clines in a contact zone of  
547 the common and spined toad (*Bufo bufo* and *B. spinosus*) in the northwest of France. *Frontiers*  
548 *in Zoology*, 13, 1–12. <https://doi.org/10.1186/s12983-016-0184-7>
- 549 Baird, S. J. E. (2015). Exploring linkage disequilibrium. *Molecular Ecology Resources*, 15, 1017–  
550 1019. <https://doi.org/10.1111/1755-0998.12424>
- 551 Barton, N. H. (1983). Multilocus clines. *Evolution*, 37, 454–471. <https://doi.org/10.2307/2408260>
- 552 Barton, N. H. (2001). The role of hybridization in evolution. *Molecular Ecology*, 10, 551–568.  
553 <https://doi.org/10.1046/j.1365-294X.2001.01216.x>
- 554 Barton, N. H. (2013). Does hybridization influence speciation? *Journal of Evolutionary Biology*, 26,  
555 267–269. <https://doi.org/10.1111/jeb.12015>
- 556 Barton, N. H., & Gale, K. S. (1993). Genetic analysis of hybrid zones. In R. G. Harrison (Ed.), *Hybrid*  
557 *zones and the evolutionary process* (pp. 13–45). New York: Oxford University Press.
- 558 Barton, N. H., & Hewitt, G. M. (1985). Analysis of hybrid zones. *Annual Review of Ecology and*  
559 *Systematics*, 16, 113–148.
- 560 Bayona-Vásquez, N. J., Glenn, T. C., Kieran, T. J., Pierson, T. W., Hoffberg, S. L., Scott, P. A., ...  
561 Faircloth, B. C. (2019). Adapterama III: Quadruple-indexed, double/triple-enzyme RADseq  
562 libraries (2RAD/3RAD). *PeerJ*, 7, e7724. <https://doi.org/10.7717/peerj.7724>
- 563 Benestan, L. M., Ferchaud, A.-L., Hohenlohe, P. A., Garner, B. A., Naylor, G. J. P., Baums, I. B., ...  
564 Luikart, G. (2016). Conservation genomics of natural and managed populations: building a  
565 conceptual and practical framework. *Molecular Ecology*, 25, 2967–77.  
566 <https://doi.org/10.1111/mec.13647>
- 567 Bierne, N., Welch, J., Loire, E., Bonhomme, F., & David, P. (2011). The coupling hypothesis: why  
568 genome scans may fail to map local adaptation genes. *Molecular Ecology*, 20, 2044–2072.  
569 <https://doi.org/10.1111/j.1365-294X.2011.05080.x>
- 570 Birstein, V. J., & Mazin, A. L. (1982). Chromosomal polymorphism of *Bufo bufo*: karyotype and C-  
571 banding pattern of *B. b. verrucosissima*. *Genetica*, 59, 93–98.  
572 <https://doi.org/10.1007/BF00133292>
- 573 Brandvain, Y., Pauly, G. B., May, M. R., & Turelli, M. (2014). Explaining Darwin’s corollary to  
574 Haldane’s rule: The role of mitonuclear interactions in asymmetric postzygotic isolation among  
575 toads. *Genetics*, 197, 743–747. <https://doi.org/10.1534/genetics.113.161133>
- 576 Buerkle, C. A., & Rieseberg, L. H. (2001). Low intraspecific variation for genomic isolation between  
577 hybridizing sunflower species. *Evolution*, 55, 684–691. [https://doi.org/10.1554/0014-3820\(2001\)055\[0684:livfgi\]2.0.co;2](https://doi.org/10.1554/0014-3820(2001)055[0684:livfgi]2.0.co;2)
- 578 Buggs, R. J. A. (2007). Empirical study of hybrid zone movement. *Heredity*, 99, 301–312.  
580 <https://doi.org/10.1038/sj.hdy.6800997>
- 581 Butlin, R. K., & Smadja, C. M. (2018). Coupling, reinforcement, and speciation. *The American*  
582 *Naturalist*, 191, 155–172. <https://doi.org/10.1086/695136>
- 583 Chhatre, V. E., & Emerson, K. J. (2017). StrAuto: automation and parallelization of STRUCTURE  
584 analysis. *BMC Bioinformatics*, 18, 1–5. <https://doi.org/10.1186/s12859-017-1593-0>
- 585 Dagilis, A. J., Kirkpatrick, M., & Bolnick, D. I. (2019). The evolution of hybrid fitness during  
586 speciation. *PLoS Genetics*, 15, e1008125.
- 587 Derryberry, E. P., Derryberry, G. E., Maley, J. M., & Brumfield, R. T. (2014). HZAR: hybrid zone  
588 analysis using an R software package. *Molecular Ecology Resources*, 14, 652–663.  
589 <https://doi.org/10.1111/1755-0998.12209>
- 590 Devitt, T. J., Baird, S. J. E., & Moritz, C. (2011). Asymmetric reproductive isolation between terminal  
591 forms of the salamander ring species *Ensatina eschscholtzii* revealed by fine-scale genetic  
592 analysis of a hybrid zone. *BMC Evolutionary Biology*, 11. <https://doi.org/10.1186/1471-2148-11-245>
- 593 Eaton, D. A. R. (2014). PyRAD: assembly of de novo RADseq loci for phylogenetic analyses.  
594 *Bioinformatics*, 30, 1844–1849. <https://doi.org/10.1093/bioinformatics/btu121>
- 595 Emelianov, I., Marec, F., & Mallet, J. (2004). Genomic evidence for divergence with gene flow in  
596 host races of the larch budmoth. *Proceedings of the Royal Society B: Biological Sciences*, 271,

- 598 97–105. <https://doi.org/10.1098/rspb.2003.2574>
- 599 Evanno, G., Regnaut, S., & Goudet, J. (2005). Detecting the number of clusters of individuals using  
600 the software STRUCTURE: a simulation study. *Molecular Ecology*, *14*, 2611–2620.  
601 <https://doi.org/10.1111/j.1365-294X.2005.02553.x>
- 602 Excoffier, L., Foll, M., & Petit, R. J. (2009). Genetic consequences of range expansions. *Annual*  
603 *Review of Ecology, Evolution, and Systematics*, *40*, 481–501.  
604 <https://doi.org/10.1146/annurev.ecolsys.39.110707.173414>
- 605 Fitzpatrick, B. M. (2012). Estimating ancestry and heterozygosity of hybrids using molecular markers.  
606 *BMC Evolutionary Biology*, *12*, 131. <https://doi.org/10.1186/1471-2148-12-131>
- 607 Francis, R. M. (2017). POPHELPER: an R package and web app to analyse and visualize population  
608 structure. *Molecular Ecology Resources*, *17*, 27–32. <https://doi.org/10.1111/1755-0998.12509>
- 609 Garcia-Porta, J., Litvinchuk, S. N., Crochet, P. A., Romano, A., Geniez, P. H., Lo-Valvo, M., ...  
610 Carranza, S. (2012). Molecular phylogenetics and historical biogeography of the west-palaearctic  
611 common toads (*Bufo bufo* species complex). *Molecular Phylogenetics and Evolution*, *63*, 113–  
612 130. <https://doi.org/10.1016/j.ympev.2011.12.019>
- 613 Gay, L., Crochet, P. A., Bell, D. A., & Lenormand, T. (2008). Comparing clines on molecular and  
614 phenotypic traits in hybrid zones: a window on tension zone models. *Evolution*, *62*, 2789–2806.  
615 <https://doi.org/10.1111/j.1558-5646.2008.00491.x>
- 616 Glenn, T. C., Nilsen, R. A., Kieran, T. J., Finger Jr., J. W., Pierson, T. W., Bentley, K. E., ...  
617 Faircloth, B. C. (2016). Adapterama I: universal stubs and primers for thousands of dual-indexed  
618 Illumina libraries (iTru & iNext). *BioRxiv*.
- 619 Gompert, Z., & Buerkle, C. A. (2011). Bayesian estimation of genomic clines. *Molecular Ecology*,  
620 *20*, 2111–2127. <https://doi.org/10.1111/j.1365-294X.2011.05074.x>
- 621 Gompert, Z., & Buerkle, C. A. (2012). bgc: software for Bayesian estimation of genomic clines.  
622 *Molecular Ecology Resources*, *12*, 1168–1176. <https://doi.org/10.1111/1755-0998.12009.x>
- 623 Gompert, Z., Parchman, T. L., & Buerkle, C. A. (2012). Genomics of isolation in hybrids.  
624 *Philosophical Transactions of the Royal Society B: Biological Sciences*, *367*, 439–450.  
625 <https://doi.org/10.1098/rstb.2011.0196>
- 626 Graham, C. F., Glenn, T. C., McArthur, A. G., Boreham, D. R., Kieran, T., Lance, S., ... Somers, C.  
627 M. (2015). Impacts of degraded DNA on restriction enzyme associated DNA sequencing  
628 (RADSeq). *Molecular Ecology Resources*, *15*, 1304–15. <https://doi.org/10.1111/1755-0998.12404>
- 629
- 630 Haldane, J. B. S. (1922). Sex ratio and unisexual sterility in hybrid animals. *Journal of Genetics*, *12*,  
631 7–109. <https://doi.org/10.1007/BF02983075>
- 632 Harrison, R. G., & Larson, E. L. (2014). Hybridization, introgression, and the nature of species  
633 boundaries. *Journal of Heredity*, *105*, 795–809. <https://doi.org/10.1093/jhered/esu033>
- 634 Harrison, R. G., & Larson, E. L. (2016). Heterogeneous genome divergence, differential  
635 introgression, and the origin and structure of hybrid zones. *Molecular Ecology*, *25*, 2454–2466.  
636 <https://doi.org/10.1111/mec.13582>
- 637 Hemelaar, A. (1988). Age, growth and other population characteristics of *Bufo bufo* from different  
638 latitudes and altitudes. *Journal of Herpetology*, *22*, 369–388.
- 639 Hewitt, G. M. (1975). A sex-chromosome hybrid zone in the grasshopper *Podisma pedestris*  
640 (Orthoptera: Acrididae). *Heredity*, *35*, 375–387. <https://doi.org/10.1038/hdy.1975.108>
- 641 Hewitt, G. M. (1988). Hybrid zones - natural laboratories for evolutionary studies. *Trends in Ecology*  
642 *and Evolution*, *3*, 158–167. [https://doi.org/10.1016/0169-5347\(88\)90033-X](https://doi.org/10.1016/0169-5347(88)90033-X)
- 643 Hoffberg, S., Kieran, T., Catchen, J., Devault, A., Faircloth, B. C., Mauricio, R., & Glenn, T. C.  
644 (2016). RADcap: sequence capture of dual-digest RADseq libraries with identifiable duplicates  
645 and reduced missing data. *Molecular Ecology Resources*, *16*, 1264–1278.  
646 <https://doi.org/10.1111/jnc.13494>
- 647 Janoušek, V., Wang, L., Luzynski, K., Dufková, P., Vyskočilová, M. M., Nachman, M. W., ...  
648 Tucker, P. K. (2012). Genome-wide architecture of reproductive isolation in a naturally  
649 occurring hybrid zone between *Mus musculus musculus* and *M. m. domesticus*. *Molecular*  
650 *Ecology*, *21*, 3032–3047. <https://doi.org/10.1111/j.1365-294X.2012.05583.x>
- 651 Jombart, T. (2008). adegenet: a R package for the multivariate analysis of genetic markers.  
652 *Bioinformatics*, *24*, 1403–1405. <https://doi.org/10.1093/bioinformatics/btn129>



- 653 Jombart, T., & Ahmed, I. (2011). adegenet 1.3-1: new tools for the analysis of genome-wide SNP  
654 data. *Bioinformatics*, 27, 3070–3071. <https://doi.org/10.1093/bioinformatics/btr521>
- 655 Kopelman, N. M., Mayzel, J., Jakobsson, M., Rosenberg, N. A., & Mayrose, I. (2015). Clumpak: a  
656 program for identifying clustering modes and packaging population structure inferences across  
657 K. *Molecular Ecology Resources*, 15, 1179–1191. <https://doi.org/10.1111/1755-0998.12387>
- 658 Larson, E. L., Andrés, J. A., Bogdanowicz, S. M., & Harrison, R. G. (2013). Differential introgression  
659 in a mosaic hybrid zone reveals candidate barrier genes. *Evolution*, 67, 3653–3661.  
660 <https://doi.org/10.1111/evo.12205>
- 661 Larson, E. L., Guilherme Becker, C., Bondra, E. R., & Harrison, R. G. (2013). Structure of a mosaic  
662 hybrid zone between the field crickets *Gryllus firmus* and *G. pennsylvanicus*. *Ecology and  
663 Evolution*, 3, 985–1002. <https://doi.org/10.1002/ece3.514>
- 664 Larson, E. L., White, T. A., Ross, C. L., & Harrison, R. G. (2014). Gene flow and the maintenance of  
665 species boundaries. *Molecular Ecology*, 23, 1668–1678. <https://doi.org/10.1111/mec.12601>
- 666 Lipshutz, S. E., Meier, J. I., Derryberry, G. E., Miller, M. J., Seehausen, O., & Derryberry, E. P.  
667 (2019). Differential introgression of a female competitive trait in a hybrid zone between sex-role  
668 reversed species. *Evolution*, 73, 188–201. <https://doi.org/10.1111/evo.13675>
- 669 Macholán, M., Munclinger, P., Šugerková, M., Dufková, P., Bímová, B., Božíková, E., ... Piálek, J.  
670 (2007). Genetic analysis of autosomal and X-linked markers across a mouse hybrid zone.  
671 *Evolution*, 61, 746–771. <https://doi.org/10.1111/j.1558-5646.2007.00065.x>
- 672 Malone, J. H., & Fontenot, B. E. (2008). Patterns of reproductive isolation in toads. *PLoS ONE*, 3,  
673 <https://doi.org/10.1371/journal.pone.0003900>
- 674 Martin, M. (2011). Cutadapt removes adapter sequences from high-throughput sequencing reads.  
675 *EMBnet.Journal*, 17, 10. <https://doi.org/10.14806/ej.17.1.200>
- 676 Morescalchi, A. (1964). Il corredo cromosomico dei Bufonidi Italiani. *Bolletino Di Zoologia*, 31,  
677 827–836. <https://doi.org/10.1080/11250006409441116>
- 678 Narum, S. R. (2006). Beyond Bonferroni: less conservative analyses for conservation genetics.  
679 *Conservation Genetics*, 7, 783–787. <https://doi.org/10.1007/s10592-005-9056-y>
- 680 Noor, M., Grams, K. L., Bertucci, L. A., & Reiland, J. (2001). Chromosomal inversions and the  
681 reproductive isolation of species. *Proceedings of the National Academy of Sciences*, 21, 12084–  
682 12088. <https://doi.org/10.1073/pnas.81.1.282>
- 683 Nosil, P., Funk, D. J., & Ortiz-Barrientos, D. (2009). Divergent selection and heterogeneous genomic  
684 divergence. *Molecular Ecology*, 18, 375–402. <https://doi.org/10.1111/j.1365-294X.2008.03946.x>
- 685  
686 Parchman, T. L., Gompert, Z., Braun, M. J., Brumfield, R. T., McDonald, D. B., Uy, J. A. C., ...  
687 Buerkle, C. A. (2013). The genomic consequences of adaptive divergence and reproductive  
688 isolation between species of manakins. *Molecular Ecology*, 22, 3304–3317.  
689 <https://doi.org/10.1111/mec.12201>
- 690 Pisanets, E. M., Litvinchuk, S. N., Rosanov, J. M., Reminniy, V. Y., Pasynkova, R. A., &  
691 Suryadnaya, N. N. M. A. S. (2009). Common toads (Amphibia, Bufonidae, *Bufo bufo* complex)  
692 from the Ciscaucasia and north of the Caucasus: the new analysis of the problem. *Zbirnik Prats’  
693 Zool. Mus.*, 40, 83–125.
- 694 Polechová, J., & Barton, N. (2011). Genetic drift widens the expected cline but narrows the expected  
695 cline width. *Genetics*, 189, 227–235. <https://doi.org/10.1534/genetics.111.129817>
- 696 Pritchard, J. K., Stephens, M., & Donnelly, P. (2000). Inference of population structure using  
697 multilocus genotype data. *Genetics*, 155, 945–959. <https://doi.org/10.1111/j.1471-8286.2007.01758.x>
- 698  
699 Rafajlović, M., Emanuelsson, A., Johannesson, K., Butlin, R. K., & Mehlis, B. (2016). A universal  
700 mechanism generating clusters of differentiated loci during divergence-with-migration.  
701 *Evolution; International Journal of Organic Evolution*, 70, 1609–1621.  
702 <https://doi.org/10.1111/evo.12957>
- 703 Ravinet, M., Faria, R., Butlin, R. K., Galindo, J., Bierne, N., Rafajlović, M., ... Westram, A. M.  
704 (2017). Interpreting the genomic landscape of speciation: finding barriers to gene flow. *Journal  
705 of Evolutionary Biology*, 30, 1450–1477. <https://doi.org/10.1111/jeb.13047>
- 706 Recuero, E., Canestrelli, D., Vörös, J., Szabó, K., Poyarkov, N. A., Arntzen, J. W., ... Martínez-  
707 Solano, I. (2012). Multilocus species tree analyses resolve the radiation of the widespread *Bufo*

- 708 *bufo* species group (Anura, Bufonidae). *Molecular Phylogenetics and Evolution*, 62, 71–86.  
709 <https://doi.org/10.1016/j.ympev.2011.09.008>
- 710 Rice, W. R. (1989). Analyzing tables of statistical tests. *Evolution*, 43, 223–225.
- 711 Rieseberg, L. H. (2001). Chromosomal rearrangements and speciation. *TRENDS in Ecology &*  
712 *Evolution*, 16, 351–358. <https://doi.org/10.1016/B978-0-12-800049-6.00074-3>
- 713 Rieseberg, L. H., Whitton, J., & Gardner, K. (1999). Hybrid zones and the genetic architecture of a  
714 barrier to gene flow between two sunflower species. *Genetics*, 152, 713–727.
- 715 Rogers, A. R., & Bohlender, R. J. (2015). Bias in estimators of archaic admixture. *Theoretical*  
716 *Population Biology*, 100, 63–78. <https://doi.org/10.1016/j.tpb.2014.12.006>
- 717 Rousset, F. (2008). GENEPOP'007: a complete re-implementation of the GENEPOP software for  
718 Windows and Linux. *Molecular Ecology Resources*, 8, 103–106. [https://doi.org/10.1111/j.1471-](https://doi.org/10.1111/j.1471-8286.2007.01931.x)  
719 [8286.2007.01931.x](https://doi.org/10.1111/j.1471-8286.2007.01931.x)
- 720 Schumer, M., Xu, C., Powell, D. L., Durvasula, A., Skov, L., Holland, C., ... Przeworski, M. (2018).  
721 Natural selection interacts with recombination to shape the evolution of hybrid genomes.  
722 *Science*, 660, 656–660. <https://doi.org/10.1126/science.aar3684>. Natural
- 723 Skorinov, D. V., Bolshakova, D. S., Donaire, D., Pasyukova, R. A., Litvinchuk, S. N., & Litvinchuk,  
724 B. (2018). Karyotypic analysis of the spined toad, *Bufo spinosus* Daudin, 1803 (Aphibia:  
725 Bufonidae). *Russian Journal of Herpetology*, 25, 253–258. [https://doi.org/10.30906/1026-2296-](https://doi.org/10.30906/1026-2296-2018-25-4-253-258)  
726 [2018-25-4-253-258](https://doi.org/10.30906/1026-2296-2018-25-4-253-258)
- 727 Stöck, M., Savary, R., Betto-Colliard, C., Biollay, S., Jourdan-Pineau, H., & Perrin, N. (2013). Low  
728 rates of X-Y recombination, not turnovers, account for homomorphic sex chromosomes in  
729 several diploid species of Palearctic green toads (*Bufo viridis* subgroup). *Journal of*  
730 *Evolutionary Biology*, 26, 674–682. <https://doi.org/10.1111/jeb.12086>
- 731 Teeter, K., Thibodeau, L. M., Gompert, Z., Buerkle, C. A., C.Nachman, M. W., & Tucker, P. K.  
732 (2009). The variable genomic architecture of isolation between hybridizing species of house  
733 mice. *Evolution*, 64, 472–485. <https://doi.org/10.1111/j.1558-5646.2009.00846.x>
- 734 Toews, D. P. L., & Brelsford, A. (2012). The biogeography of mitochondrial and nuclear discordance  
735 in animals. *Molecular Ecology*, 21, 3907–3930. [https://doi.org/10.1111/j.1365-](https://doi.org/10.1111/j.1365-294X.2012.05664.x)  
736 [294X.2012.05664.x](https://doi.org/10.1111/j.1365-294X.2012.05664.x)
- 737 van Riemsdijk, I., Butlin, R. K., Wielstra, B., & Arntzen, J. W. (2018). Testing an hypothesis of  
738 hybrid zone movement for toads in France. *Molecular Ecology*, 28, 1070–1083.  
739 <https://doi.org/10.1111/mec.15005>
- 740 Vines, T. H., Dalziel, A. C., Albert, A. Y. K., Veen, T., Schulte, P. M., & Schluter, D. (2016). Cline  
741 coupling and uncoupling in a stickleback hybrid zone. *Evolution*, 70, 1023–1038.  
742 <https://doi.org/10.1111/evo.12917>
- 743 Wang, L., Luzynski, K., Pool, J. E., Janoušek, V., Dufková, P., Vyskočilová, M. M., ... Tucker, P. K.  
744 (2011). Measures of linkage disequilibrium among neighbouring SNPs indicate asymmetries  
745 across the house mouse hybrid zone. *Molecular Ecology*, 20, 2985–3000.  
746 <https://doi.org/10.1111/j.1365-294X.2011.05148.x>
- 747 Wickbom, T. (1945). Cytological studies on Dipnoi, Urodela, Anura, and Emys. *Hereditas*, 31, 241–  
748 346. <https://doi.org/10.1111/j.1601-5223.1945.tb02756.x>
- 749 Wielstra, B. (2019). Historical hybrid zone movement: more pervasive than appreciated. *Journal of*  
750 *Biogeography*, 1–6. <https://doi.org/10.1111/jbi.13600>
- 751 Wielstra, B., & Arntzen, J. W. (2012). Postglacial species displacement in Triturus newts deduced  
752 from asymmetrically introgressed mitochondrial DNA and ecological niche models. *BMC*  
753 *Evolutionary Biology*, 12, 1–12.
- 754 Wielstra, B., Burke, T., Butlin, R. K., & Arntzen, J. W. (2017). A signature of dynamic biogeography:  
755 enclaves indicate past species replacement. *Proceedings of the Royal Society Biological*  
756 *Sciences*, 284, 1–6.
- 757 Wielstra, B., Burke, T., Butlin, R. K., Avcı, A., Üzüüm, N., Bozkurt, E., ... Arntzen, J. W. (2017). A  
758 genomic footprint of hybrid zone movement in crested newts. *Evolution Letters*, 1, 93–101.  
759 <https://doi.org/10.1002/evl3.9>
- 760 Yeaman, S., & Whitlock, M. C. (2011). The genetic architecture of adaptation under migration-  
761 selection balance. *Evolution*, 65, 1897–1911. <https://doi.org/10.1111/j.1558-5646.2011.01269.x>  
762

763

764 **Data Accessibility Statement**

765 In- and output of analyses, and custom R scripts will be available at Dryad. Raw sequencing  
766 data will be available at GenBank.

767

768 **Author contributions**

769 IvR, JWA, BS, and BW designed the study. IvR and JWA collected samples. IvR performed  
770 the laboratory work and data assembly with contributions from GB, EMM, PS, and ET. IvR  
771 analysed and interpreted the data with contributions from BS, BW, JWA, MR, and PS. IvR  
772 wrote the manuscript with input from all authors.

773

774 Tables and figures

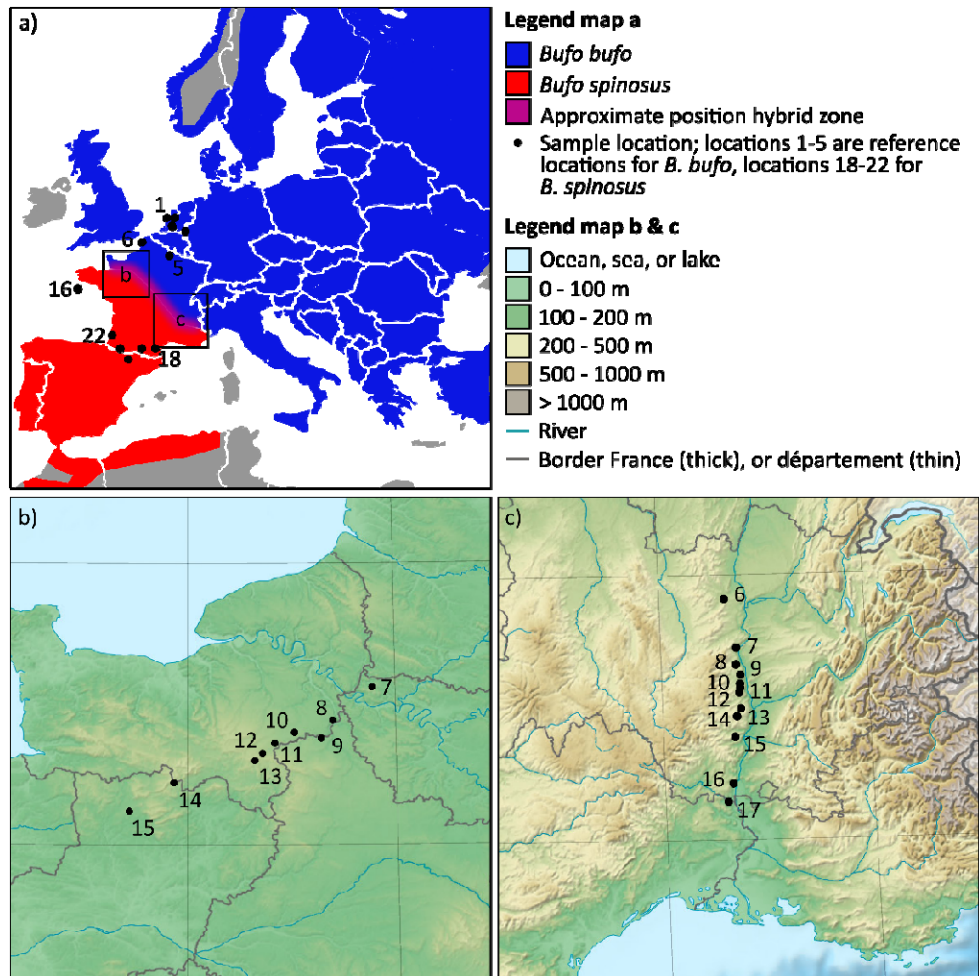

775

776 **Figure 1:** Overview map with a) the distribution of *Bufo bufo* and *B. spinosus*, with small squares indicating the  
777 locations of map b) for transect one in northwest France (sample locations 6-16), and map c) for transect two in  
778 southeast France (sample locations 6-17). The base map for panel b and c was downloaded from  
779 <https://www.mapsland.com>

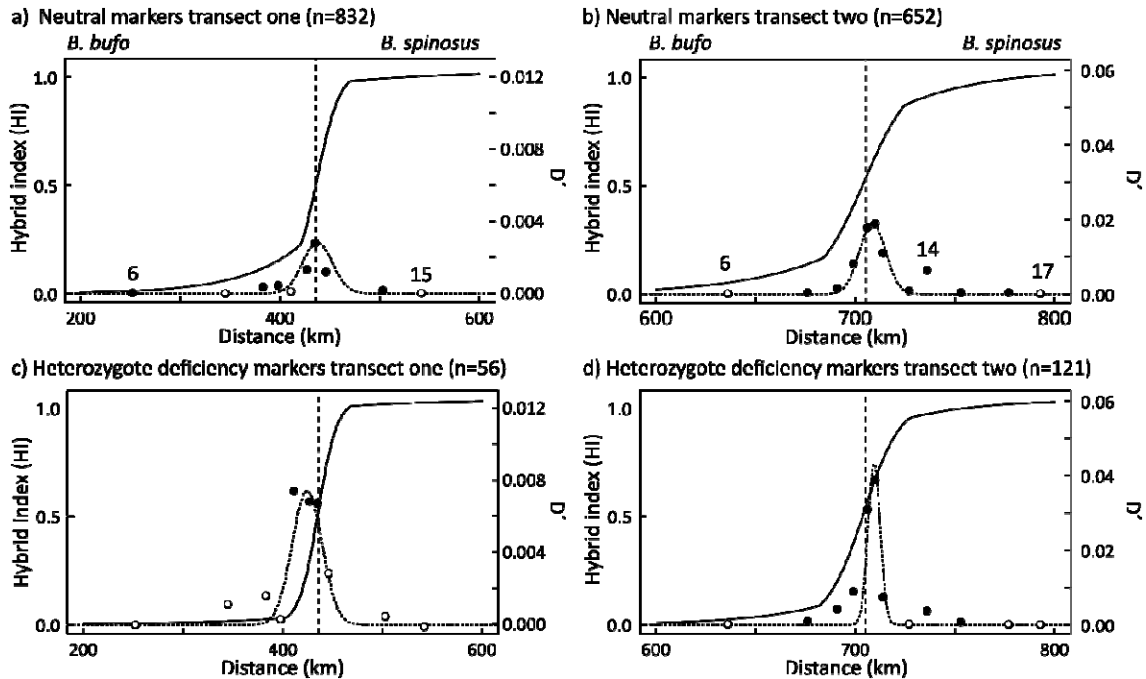

780  
781  
782  
783  
784  
785  
786  
787  
788  
789

**Figure 2:** Geographic clines for the hybrid index (HI) and admixture linkage disequilibrium peaks ( $D'$ ) for neutral markers (i.e. not assigned by BGC as an outlier in any category) according to the genomic clines analysis for (a) transect one and (b) transect two, and for heterozygote deficiency markers ( $\beta > 0$ ) for (c) transect one and (d) for transect two. The x-axis shows distance along the transect, note that the axis for transect two is half the length (200 km) of the axis for transect one (400 km). The y-axis on the left shows the HI (solid line), and the y-axis on the right shows  $D'$  (dotted line and dots). The right y-axis for transect one is five times shorter than for transect two. Solid dots show  $D'$  significantly different from zero, whilst open dots are not significantly different from zero, based on 95% confidence intervals.

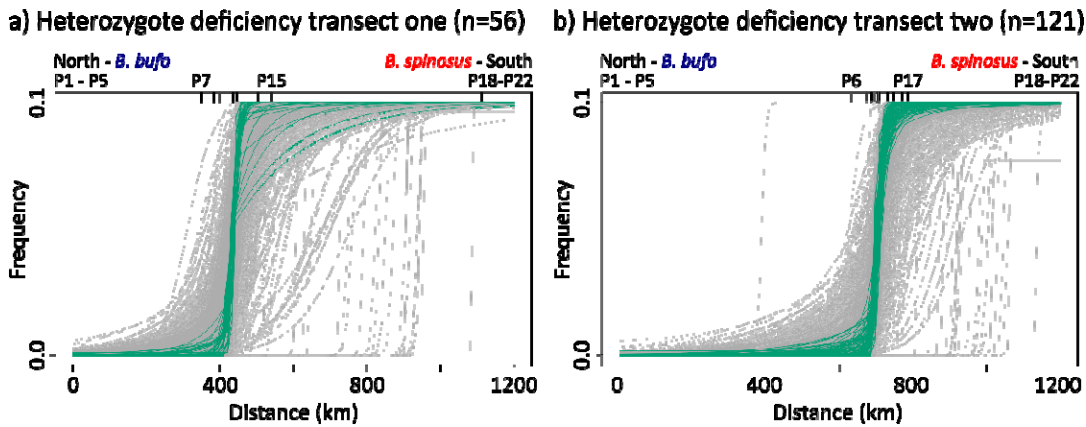

790  
791  
792  
793  
794  
795  
796  
797

**Figure 3:** Geographic clines for markers showing barrier markers (green) for (a) transect one and (b) transect two with frequency of the *B. spinosus* allele on the y-axis and distance along the transect on the x-axis. Inward ticks on the top of the graph and notation near inward ticks on the top of the graph (P) refers to locations in Fig. 1.

798 **Table 1:** Bayesian genomic cline (BGC) results comparing significant outliers for transect one (T1) and transect  
799 two (T2), and the markers which were outliers in both transects (overlap), where significance of outliers is based  
800 on the exclusion of 0 in the 99.9% confidence interval (CI). The total number of markers analysed was 1,189.

| <b>Outlier</b> | <b>Biological interpretation</b>                                      | <b>T1</b>        | <b>T2</b>        | <b>Overlap</b>  |
|----------------|-----------------------------------------------------------------------|------------------|------------------|-----------------|
| $\alpha < 0$   | Directional introgression from <i>B. bufo</i> into <i>B. spinosus</i> | 151 <sup>†</sup> | 185 <sup>‡</sup> | 92 <sup>§</sup> |
| $\alpha > 0$   | Directional introgression from <i>B. spinosus</i> into <i>B. bufo</i> | 110 <sup>†</sup> | 174 <sup>‡</sup> | 49 <sup>§</sup> |
| $\beta < 0$    | Heterozygote excess                                                   | 50               | 105              | 11 <sup>¶</sup> |
| $\beta > 0$    | Heterozygote deficiency                                               | 56               | 123              | 26 <sup>§</sup> |

801 The significance tests are; (1) a Chi-squared comparing the values  $\alpha$  outliers of only T1 and T2 to test if there is  
802 a significant difference in the number of outliers between the transects. A 2x2 contingency Chi-squared (2) was  
803 conducted to test if the overlap between the transects of both  $\alpha$  and  $\beta$  outliers could be a coincidence, or is  
804 unlikely to have occurred under a model of random resampling.

805 <sup>†</sup>Significant Chi-squared with 6.4406, df = 1, P = 0.0112

806 <sup>‡</sup>Not significant Chi-squared with 0.3371, df = 1, P = 0.5615

807 <sup>§</sup>Significant 2x2 contingency Chi-squared with 285.05, 91.629, 81.288, df = 1, P < 2.2e<sup>-16</sup>

808 <sup>¶</sup>Significant 2x2 contingency Chi-squared with 10.331, df = 1, P = 0.001308
